# Supplementary material for: Effects of a 1-mm Difference in Bearing Thickness on Intraoperative Bearing Movement and Kinematics in Oxford Unicompartmental Knee Arthroplasty
Source: Research Square preprint supplement (doi:10.21203/rs.3.rs-763669/v1), 2021-08-12
Supplement: Supplementary file 1 [file afc155f94004b591300e2e3d.docx]

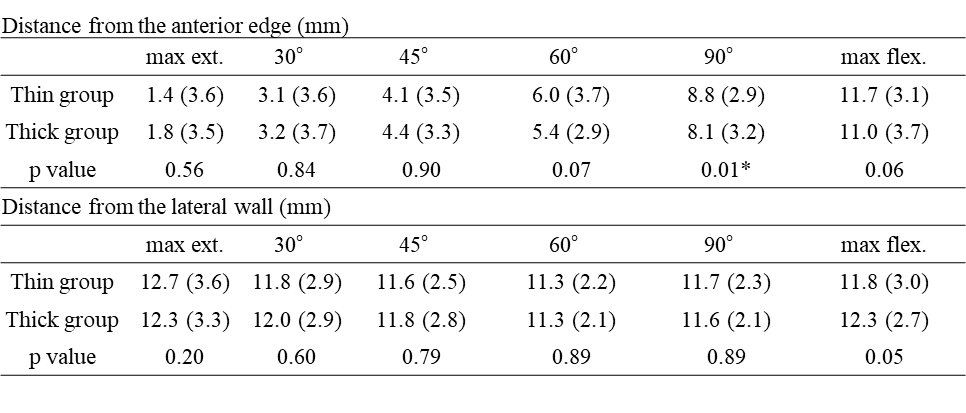


Average (standard deviation)

max. ext.: maximum extension, max flex.: maximum flexion

Table 3 Intraoperative bearing movement of Point B for the mobile bearing
